# Supplementary material
Source: Springer Nature journal article supplement (https://www.springermedizin.de/resource/supplementary/13019_2013_1415_MOESM1_ESM.pdf/9640616)

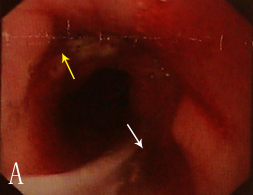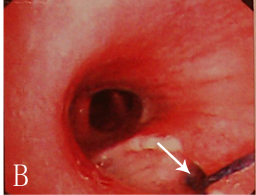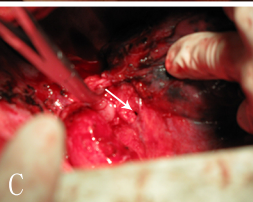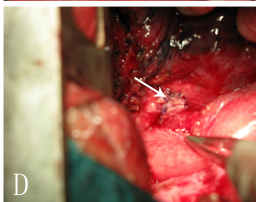

Supplement: MOESM1 [file 9640616]
